# Supplementary material for: Complete Blood Count Reference Intervals for Children Aged Less Than 1 to 12 Years in the Northern Region of Ghana
Source: Hindawi journal article supplement (doi:10.1155/2024/6607281), 2024-05-10
Supplement: f1 [file 6607281.f1.pdf]

**S1 Table. CBC reference intervals Tamale children by sex**

| Parameters                  | Combined     |        |                  |                          |
|-----------------------------|--------------|--------|------------------|--------------------------|
|                             | N            | Median | Reference Values | 90% C.I†                 |
| RBC (10 <sup>6</sup> /μL)   | 379          | 4.28   | 3.58 - 5.04      | 3.49-3.65; 4.93-5.16     |
| Hb (g/dL)                   | 376          | 11.1   | 9.40 - 12.56     | 9.05-9.70; 12.40-12.60   |
| HCT (%)                     | 377          | 35.3   | 29.50 - 41.41    | 29.14-30.13; 40.53-42.06 |
| MCV (μm <sup>3</sup> )      | 379          | 82.5   | 70.45 - 92.85    | 68.67-71.92; 91.58-93.96 |
| MCH (pg)                    | 374          | 25.3   | 20.60 - 29.00    | 19.83-21.1; 28.7-29.26   |
| MCHC (g/dL)                 | 368          | 30     | 28.00 - 34.00    | 27.63-28; 34-34          |
| RDW-CV (%)                  | 368          | 8.4    | 7.30 - 10.00     | 7.02-7.4; 9.80-10.27     |
| RDW-SD (μm <sup>3</sup> )   | 380          | 47.5   | 38.71 - 52.68    | 37.6-39.54; 52.3-53.9    |
| PLT (10 <sup>3</sup> /μL)   | 385          | 318    | 121-580          | 105-144; 538-598         |
| WBC(10 <sup>3</sup> /μL)    | 373          | 5.98   | 3.70 - 8.61      | 3.4-3.9; 8.38-8.9        |
| LYM # (10 <sup>3</sup> /μL) | 379          | 2.42   | 1.13 - 3.93      | 0.92-1.23; 3.83-4.06     |
| LYM %                       | 381          | 42.33  | 24.97 - 59.20    | 21.46-26.54; 57.59-62.56 |
| MON # (10 <sup>3</sup> /μL) | 372          | 0.43   | 0.19 - 0.74      | 0.14-0.21; 0.69-0.78     |
| MON %                       | 366          | 7.1    | 3.60 - 10.99     | 3.22-3.78; 10.77-11.29   |
| NEU # (10 <sup>3</sup> /μL) | 370          | 2.65   | 1.28 - 4.59      | 1.12-1.37; 4.28-4.76     |
| NEU %                       | 384          | 45.74  | 27.46 - 66.08    | 24.34-29.96; 66.55-68.74 |
| EOS # (10 <sup>3</sup> /μL) | 353          | 0.14   | 0.02 - 0.44      | 0.01-0.03; 0.41-0.46     |
| EOS %                       | 345          | 2.25   | 0.43 - 6.70      | 0.22-0.61; 6.54-7.15     |
| BAS # (10 <sup>3</sup> /μL) | 344          | 0.01   | 0.00 - 0.03      | 0-0; 0.03-0.03           |
| BAS %                       | 338          | 0.16   | 0.06 - 0.40      | 0.06-0.06; 0.37-0.42     |
|                             | <b>Males</b> |        |                  |                          |
| RBC (10 <sup>6</sup> /μL)   | 196          | 4.33   | 3.58 - 5.09      | 3.39-3.69; 4.90-5.19     |
| Hb (g/dL)                   | 195          | 11.2   | 9.80 - 12.60     | 9.70-9.90; 12.49-12.60   |
| HCT (%)                     | 195          | 35.3   | 29.28 - 41.50    | 28.25-30.01; 40.59-41.95 |
| MCV (μm <sup>3</sup> )      | 194          | 81.85  | 68.85 - 91.35    | 67.3-71.10; 89.5-93.66   |
| MCH (pg)                    | 190          | 25.4   | 20.19 - 29.10    | 19.64-21.07; 28.61-30.11 |
| MCHC (g/dL)                 | 190          | 31     | 28.00 - 34.00    | 27.42-29; 34-34.57       |
| RDW-CV (%)                  | 189          | 8.5    | 7.40 - 10.00     | 7.3-7.5; 9.8-10.26       |
| RDW-SD (μm <sup>3</sup> )   | 197          | 46.7   | 39.38 - 52.30    | 38.13-41.01; 51.552.68   |
| PLT (10 <sup>3</sup> /μL)   | 199          | 308    | 124 - 598        | 102-146; 535-618         |
| WBC(10 <sup>3</sup> /μL)    | 193          | 6      | 3.80 - 8.62      | 3.23-4.03; 8.30-9.11     |
| LYM # (10 <sup>3</sup> /μL) | 195          | 2.38   | 1.36 - 3.91      | 1.13-1.51; 3.71-4.30     |
| LYM %                       | 200          | 41.1   | 26.23 - 57.40    | 22.22-27.15; 55.78-58.29 |
| MON # (10 <sup>3</sup> /μL) | 191          | 0.44   | 0.20 - 0.74      | 0.14-0.24; 0.70-0.78     |
| MON %                       | 190          | 7.07   | 3.73 - 10.83     | 2.84-4.26; 10.55-11.28   |
| NEU # (10 <sup>3</sup> /μL) | 189          | 2.74   | 1.25 - 4.24      | 1.02-1.40; 3.99-4.65     |
| NEU %                       | 201          | 47.16  | 30.16 - 65.66    | 23.32-31.47; 62.82-69.39 |
| EOS # (10 <sup>3</sup> /μL) | 177          | 0.13   | 0.03 - 0.45      | 0.01-0.05; 0.41-0.47     |
| EOS %                       | 174          | 2.1    | 0.51 - 6.85      | 0.15-0.65; 6.58-7.25     |
| BAS # (10 <sup>3</sup> /μL) | 184          | 0.01   | 0.00 - 0.03      | 0-0; 0.02-0.03           |

|                             |     |       |               |                          |
|-----------------------------|-----|-------|---------------|--------------------------|
| BAS %                       | 184 | 0.16  | 0.06 - 0.40   | 0.05-0.06; 0.38-0.42     |
| <b>Females</b>              |     |       |               |                          |
| RBC (10 <sup>6</sup> /μL)   | 183 | 4.26  | 3.57 - 5.03   | 3.48-3.67; 4.91-5.25     |
| Hb (g/dL)                   | 181 | 11.1  | 9.12 - 12.40  | 8.80-9.40; 12.20-12.60   |
| HCT (%)                     | 182 | 35.4  | 30.16 - 41.64 | 29.26-31.13; 40.23-42.30 |
| MCV (μm <sup>3</sup> )      | 185 | 83.3  | 73.01 - 93.87 | 70.38-74.37; 92.05-85.97 |
| MCH (pg)                    | 184 | 25.3  | 20.73 - 29.0  | 20.04-21.47; 28.63-29.26 |
| MCHC (g/dL)                 | 178 | 30    | 28.0 - 33.81  | 27.08-28; 33.05-34.17    |
| RDW-CV (%)                  | 179 | 8.3   | 7.05 - 10.15  | 7-7.4; 9.74-10.5         |
| RDW-SD (μm <sup>3</sup> )   | 183 | 47.5  | 37.96 - 53.90 | 37.6-39.24; 52.3-54.7    |
| PLT (10 <sup>3</sup> /μL)   | 186 | 327   | 108 - 572     | 102-168; 521-582         |
| WBC(10 <sup>3</sup> /μL)    | 180 | 5.83  | 3.51 - 8.65   | 3.05-3.9; 8.20-9.04      |
| LYM # (10 <sup>3</sup> /μL) | 184 | 2.46  | 0.94 - 3.96   | 0.58-1.20; 3.82-4.22     |
| LYM %                       | 181 | 44.21 | 23.41 - 62.36 | 19.73-26.32; 59.17-66.47 |
| MON # (10 <sup>3</sup> /μL) | 181 | 0.42  | 0.16 - 0.72   | 0.10-0.21; 0.64-0.8      |
| MON %                       | 176 | 7.27  | 3.50 - 11.21  | 2.98-3.69; 10.79-11.67   |
| NEU # (10 <sup>3</sup> /μL) | 181 | 2.47  | 1.31 - 4.75   | 0.63-1.41; 4.48-4.88     |
| NEU %                       | 183 | 44.79 | 25.70 - 66.76 | 19.81-29.53; 64.54-70.41 |
| EOS # (10 <sup>3</sup> /μL) | 176 | 0.15  | 0.01 - 0.45   | 0.01-0.02; 0.37-0.48     |
| EOS %                       | 171 | 2.43  | 0.36 - 6.65   | 0.14-0.65; 5.84-7.35     |
| BAS # (10 <sup>3</sup> /μL) | 160 | 0.01  | 0.00 - 0.03   | 0-0; 0.03-0.03           |
| BAS %                       | 154 | 0.16  | 0.06 - 0.40   | 0.06-0.07; 0.32-0.42     |

CI†: confidence interval values for lower and upper limits.
